# Supplementary material for: Radiological evolution of spinal disease in alkaptonuria and the effect of nitisinone
Source: HighWire-hosted journal article supplement (doi:10.1136/rmdopen-2022-002422), 2022-10-01
Supplement: rmdopen-2022-002422supp002_data_supplement.pdf [file rmdopen-2022-002422supp002_data_supplement.pdf]

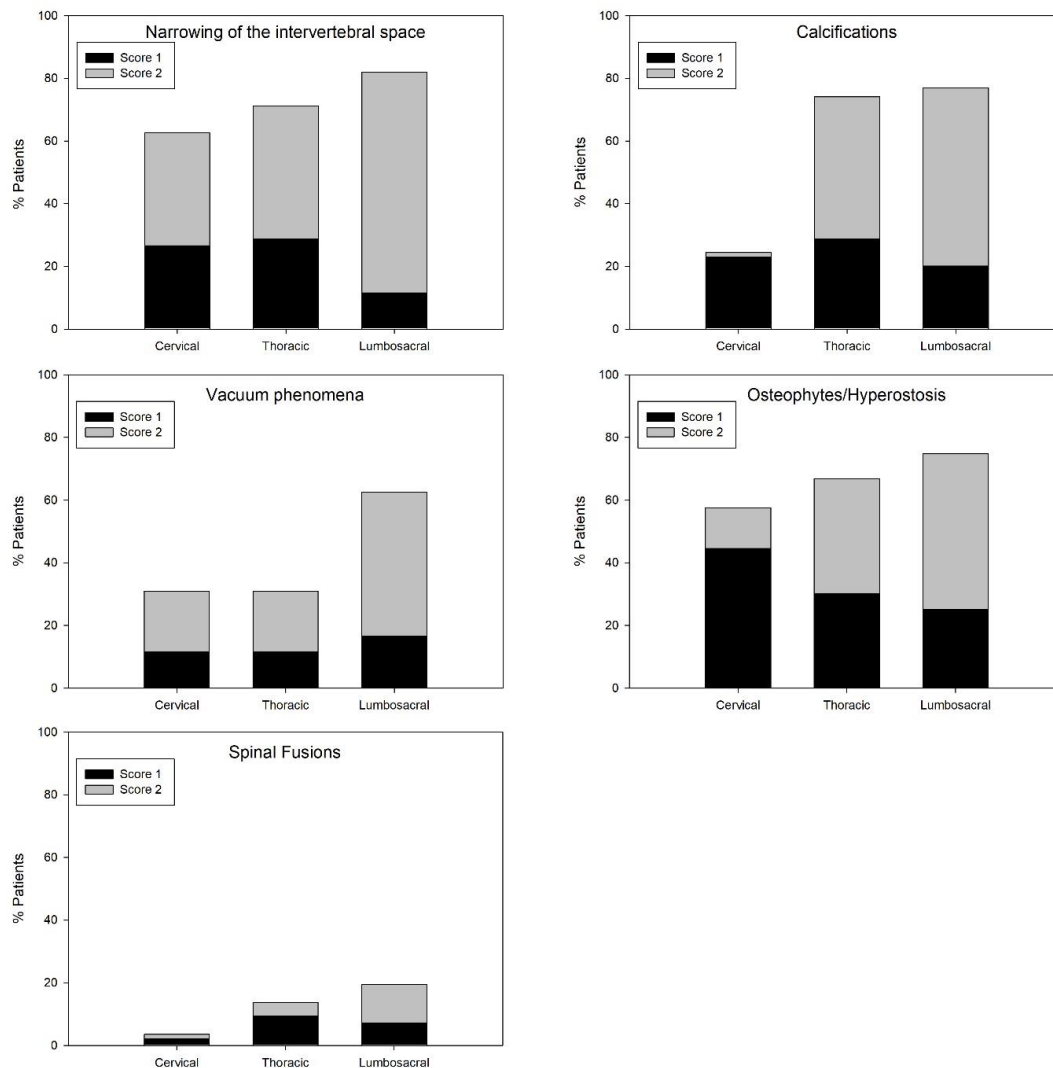

Supplementary Figure S2. Proportions of patients with score 1 (black bar) or score 2 (grey bar) in the cervical, thoracic, and lumbar regions of the spine in alkaptonuria (AKU) patients for the following radiographic features: narrowing of the intervertebral space, soft tissue calcifications, vacuum phenomena, osteophytes and/or hyperostosis and spinal fusion.
