# Supplementary material for: Radiological evolution of spinal disease in alkaptonuria and the effect of nitisinone
Source: HighWire-hosted journal article supplement (doi:10.1136/rmdopen-2022-002422), 2022-10-01
Supplement: rmdopen-2022-002422supp005_data_supplement.pdf [file rmdopen-2022-002422supp005_data_supplement.pdf]

|                                               | Visit 1<br>Month 0 | Visit 2<br>Month 3 | Visit 3<br>Month<br>12 | Visit 4<br>Month<br>24 | Visit 5<br>Month<br>36 | Visit 6<br>Month<br>48 | Visit 7<br>Month<br>49 <sup>1</sup> |
|-----------------------------------------------|--------------------|--------------------|------------------------|------------------------|------------------------|------------------------|-------------------------------------|
| Dispense nitisinone<br>(treatment group only) | X                  | X                  | X                      | X                      | X                      |                        |                                     |
| Drug accountability<br>(treatment group only) |                    | X                  | X                      | X                      | X                      | X                      |                                     |
| Prior and concomitant<br>medication           | X                  | X                  | X                      | X                      | X                      | X                      | X                                   |
| Adverse Events <sup>4</sup>                   | X                  | X                  | X                      | X                      | X                      | X                      | X                                   |

Supplementary Table S3. Procedures performed during the SONIA2 study. <sup>1</sup>Telephone contact only,

<sup>2</sup>Including weight and height, <sup>3</sup>Women of childbearing potential, <sup>4</sup>All serious adverse events reported

to the follow-up visit (Visit 7), or at least 28 days after Visit 6, and thereafter only serious adverse

events judged to be related to the investigational medicinal product.
